## 1 **Summary**

2 Co-production of two or more desirable compounds from low-cost substrates by a single  
3 microbial catalyst could greatly improve the economic competitiveness of many  
4 biotechnological processes. However, reports demonstrating the adoption of such co-  
5 production strategy are still scarce. In this study, the ability of genome-edited strain  
6 *Pseudomonas putida* EM42 to simultaneously valorise D-xylose and D-cellobiose - two  
7 important lignocellulosic carbohydrates - by converting them into the platform chemical D-  
8 xylonic acid and medium chain length polyhydroxyalkanoates, respectively, was investigated.  
9 Biotransformation experiments performed with *P. putida* resting cells showed that  
10 promiscuous periplasmic glucose oxidation route can efficiently generate extracellular  
11 xylonate with high yield reaching 0.97 g per g of supplied xylose. Xylose oxidation was  
12 subsequently coupled to the growth of *P. putida* with cytoplasmic  $\beta$ -glucosidase BglC from  
13 *Thermobifida fusca* on D-cellobiose. This disaccharide turned out to be a better co-substrate  
14 for xylose-to-xylonate biotransformation than monomeric glucose. This was because unlike  
15 glucose, cellobiose did not block oxidation of the pentose by periplasmic glucose  
16 dehydrogenase Gcd, but, similarly to glucose, it was a suitable substrate for  
17 polyhydroxyalkanoate formation in *P. putida*. Co-production of extracellular xylose-born  
18 xylonate and intracellular cellobiose-born medium chain length polyhydroxyalkanoates was  
19 established in proof-of-concept experiments with *P. putida* grown on the disaccharide. This  
20 study highlights the potential of *P. putida* EM42 as a microbial platform for the production of  
21 xylonic acid, identifies cellobiose as a new substrate for mcl-PHA production, and proposes a  
22 fresh strategy for the simultaneous valorisation of xylose and cellobiose.

23

24

## 1 Introduction

2 Up to 220 million tonnes of lignocellulosic and cellulosic waste are potentially available for  
3 biotechnological purposes only in the EU every year (Searles and Malins, 2013).  
4 Lignocellulose can be decomposed by physical or chemical pre-treatment to cellulose,  
5 hemicellulose, and lignin and these fractions can be further hydrolysed enzymatically to  
6 monomeric sugars and lignin-derived aromatics serving as cheap substrates for microbial  
7 fermentations and biosynthesis of value-added chemicals (VAC) (Mosier *et al.*, 2005;  
8 Kawaguchi *et al.*, 2016). Economics of these bioprocesses is regrettably still often  
9 unsatisfactory but can be significantly improved by parallel valorisation of two or more  
10 lignocellulosic substrates. This is allowed by co-streaming of carbon from several sources into  
11 a single valued compound or by simultaneous production of two or more VAC (Dumon *et al.*,  
12 2012; Li *et al.*, 2017; Larroude *et al.*, 2018; Baral *et al.*, 2019; Wang *et al.*, 2019). Co-  
13 production of extracellular and intracellular biochemicals is desirable for facilitated  
14 downstream processing (Wang *et al.*, 2019). However, studies reporting such parallel  
15 biomanufacturing of two VAC from the second generation carbon sources are infrequent and  
16 well-defined cell factories that could efficiently perform these tasks are scarce.

17 The soil bacterium and growingly used robust platform strain *P. putida* KT2440 can naturally  
18 assimilate a spectrum of aromatic compounds and organic acids but only a few plant biomass-  
19 derived carbohydrates: glucose, mannose and fructose (Linger *et al.*, 2014; Belda *et al.*, 2016;  
20 Nickel and de Lorenzo, 2018; Jayakody *et al.*, 2018). Its metabolism was engineered to reach  
21 out to other sugars, including carbohydrates typically produced upon (hemi)cellulose  
22 hydrolysis or pyrolysis (Meijnen *et al.*, 2008; Linger *et al.*, 2016; Löwe *et al.*, 2018). In a recent  
23 work, *P. putida* EM42, a *P. putida* KT2440-derived strain with streamlined genome and better  
24 physiological properties (Martínez-García *et al.*, 2014), was empowered with a xylose  
25 transporter and isomerase pathway from *Escherichia coli* along with a cytoplasmic  $\beta$ -

1 glucosidase BglC from *Thermobifida fusca* (Dvořák and de Lorenzo, 2018). This allowed the  
2 resulting strain to co-utilise and grow on mixtures of D-glucose, D-cellobiose, and D-xylose.  
3 However, the mix of carbohydrates was metabolized and converted into CO<sub>2</sub> and biomass  
4 without any other return.

5 There are various possibilities to use *P. putida* for VAC biomanufacturing from glucose and  
6 cellobiose (Poblete-Castro *et al.*, 2012; Loeschcke and Thies, 2015). *P. putida* KT2440 has  
7 been traditionally employed as a model organism for the production of medium-chain-length  
8 polyhydroxyalkanoates (mcl-PHA), biodegradable polyesters applicable for manufacturing of  
9 packaging materials, textile, or medical implants (Chen, 2009; Prieto *et al.*, 2016; Li *et al.*,  
10 2017). The mcl-PHA have better elastomeric properties and broader application potential than  
11 short-chain-length PHA produced by *Cupriavidus necator* or recombinant *E. coli* (Chen, 2009).  
12 Synthesis of mcl-PHA was demonstrated from fatty acids and unrelated substrates such as  
13 acetate, ethanol, glycerol, or some sugars including glucose (Prieto *et al.*, 2016) but never from  
14 cellodextrins such as cellobiose. In a previous study, we also identified the ability of *P. putida*  
15 EM42 to oxidize D-xylose to D-xylonic acid, a platform molecule of considerable  
16 biotechnological interest (Werpy and Petersen, 2004; Toivari *et al.*, 2012; Mehtiö *et al.*, 2016;  
17 Dvořák and de Lorenzo, 2018). D-xylonate was reported to be used as a complexing agent or  
18 chelator, as a precursor of polyesters, 1,2,4-butanetriol, ethylene glycol or glycolate, and it can  
19 serve as a cheap, non-food derived alternative for D-gluconic acid (Toivari *et al.*, 2012).  
20 Xylonate is naturally formed in the first step of oxidative metabolism of xylose by some  
21 archaea, bacteria, and fungi *via* the action of D-xylose or D-glucose dehydrogenases.  
22 Production of xylonate was reported for instance in *Gluconobacter oxydans*, in several  
23 *Pseudomonas* strains including *P. fragi*, *P. taiwanensis* or *P. putida* S12, or in *Klebsiella*  
24 *pneumoniae* (Buchert *et al.*, 1988; Meijnen *et al.*, 2009; Köhler *et al.*, 2015; Wang *et al.*, 2016).  
25 Several other microorganisms including *Escherichia coli* or *Saccharomyces cerevisiae* were

1 engineered for xylonate production from xylose (Nygård *et al.*, 2011; Liu *et al.*, 2012; M.  
2 Toivari *et al.*, 2012; Gao *et al.*, 2019). High production costs nonetheless hinder  
3 commercialization of both xylonate and mcl-PHA and new solutions are appealing for easing  
4 the biomanufacture of these chemicals (Chen, 2009; M. H. Toivari *et al.*, 2012; Mehtiö *et al.*,  
5 2016, Li *et al.*, 2017). Their co-production from the second generation carbon sources can thus  
6 be a promising approach in this context.

7 We present below our efforts to merge the advantages of *P. putida* EM42 as a natural xylonate  
8 producer with the ability of an engineered variant to grow on cellulose-derived substrate. Our  
9 results confirm that *P. putida* EM42 can convert xylose to xylonate with a high yield with its  
10 periplasmic glucose oxidative pathway and release the acid in the medium (Fig. 1).  
11 Furthermore, we show that xylonate production is inhibited in the presence of glucose but does  
12 occur in the cellobiose-grown recombinant strain. Most importantly, we demonstrate that  
13 periplasmic production and release of xylonate by cellobiose-grown *P. putida* EM42 is  
14 accompanied by parallel accumulation of mcl-PHA in the cells.

15

## 16 **Results and Discussion**

### 17 ***Biotransformation of xylose to xylonate by P. putida EM42 resting cells***

18 Periplasmic xylose conversion to xylonate was previously identified as a competing reaction  
19 for xylose assimilation by recombinant *P. putida* EM42 during a five-day cultivation  
20 experiment (Dvořák and de Lorenzo, 2018). Periplasmic glucose dehydrogenase was shown  
21 to be a crucial component for xylose oxidation in our strain as well as in several xylonate  
22 producing bacteria including *Klebsiella pneumoniae* and some other pseudomonads (Hardy *et*  
23 *al.*, 1993; Meijnen *et al.*, 2008; Köhler *et al.*, 2014; Wang *et al.*, 2016; Dvořák and de Lorenzo,  
24 2018). In *P. putida* KT2440, and correspondingly also in strain EM42, membrane-bound

1 glucose dehydrogenase Gcd (PP1444) oxidises xylose to xylonolactone with pyrroloquinoline  
2 quinone (PQQ) as a cofactor. Lactone can then open spontaneously in the presence of water or  
3 might be converted to xylonate with the help of gluconolactonase Gnl (PP1170). Neither xylose  
4 nor xylonate is utilised for biomass formation (Dvořák and de Lorenzo, 2018).

5 Here, we initially tested whether xylose can be oxidized to xylonate in a short time interval and  
6 with a high yield by *P. putida* resting cells of defined optical density. Xylonolactone  
7 concentrations were newly determined in culture supernatants using the hydroxamate method  
8 (Lien, 1959), which allowed more precise quantification of xylonate than in our previous work  
9 (Dvořák and de Lorenzo, 2018). *P. putida* EM42 cells (strains and plasmids used in this study  
10 are listed in Supplementary Table S1), pre-cultured in lysogeny broth (LB), washed and diluted  
11 to a starting OD<sub>600</sub> ~ 0.5, were incubated for 48 h in M9 minimal medium with 5 g L<sup>-1</sup> xylose  
12 (Fig. 2A). The yield of extracellular xylonate detected in the medium at the end of the  
13 incubation was 0.95 g per g of xylose which was 85% of the theoretical maximum 1.12 g g<sup>-1</sup>.  
14 Lactone accumulated in small quantities (up to 0.45 g L<sup>-1</sup>) in the medium during the initial  
15 phase of fast xylose conversion, but its concentration then declined to zero at the end of the  
16 experiment. Dehydrogenase activity measured with whole cells reached 2.87 ± 0.21 U per gram  
17 of dry biomass. The release of sugar acid was accompanied by a pH drop in the medium from  
18 the initial 7.00 ± 0.00 to 6.15 ± 0.04 at the end of the reaction. Neither lactone nor xylonate  
19 was detected in the identical experiment repeated with *P. putida* EM42 Δ*gcd* mutant lacking  
20 glucose dehydrogenase (Fig. 2B). These experiments confirmed the importance of Gcd for D-  
21 xylose oxidation to xylonate in *P. putida* EM42 and showed that xylonolactone intermediate is  
22 converted rapidly to xylonic acid which is released into the medium rather than utilised by the  
23 cells. In contrast, a study with *P. fragi* (the best-described pseudomonad in term of xylonate  
24 production thus far), reported slow spontaneous hydrolysis and accumulation of inhibitory  
25 xylonolactone in this bacterium during the early phases of fermentation experiments (Buchert

1 *et al.*, 1986; Buchert and Viikari, 1988). Another well-characterized xylose-oxidizing  
2 pseudomonad, *P. taiwanensis* VLB120, uses xylonate for biomass formation (Köhler *et al.*,  
3 2014). *P. putida* thus represents an attractive addition to these strains for fast high-yield  
4 production of extracellular xylonate.

5 It is worth noting that the resting *P. putida* cells could be recycled and used repeatedly in five  
6 cycles of xylose oxidation to xylonic acid (Supplementary Fig. S1). The conversion reached  
7 94 % in the first cycle, then decreased and reached 60 % in the last fifth cycle. As the optical  
8 density of the cells measured at the end of each cycle continuously decreased, the decline in  
9 productivity can be attributed mainly to the loss of the biomass in the reactions due to the  
10 centrifugation/re-suspension cycles and cell lysis (Supplementary Fig. S1). Medium pH drop  
11 detected at the end of each cycle corresponded with the level of xylose-to-xylonate conversion  
12 (Supplementary Fig. S1). This result indicates that the xylose oxidation in *P. putida* EM42 is  
13 not necessarily growth-dependent as reported with *P. fragi* (Buchert *et al.*, 1986; Buchert and  
14 Viikari, 1988). It is worth to note that a number of studies on microbial xylonate production  
15 have reported the association of xylose oxidation to a host's growth (Toivari *et al.*, 2012;  
16 Köhler *et al.*, 2014; Wang *et al.*, 2016) but some have not. One example of the latter is recent  
17 work by Zhou and co-workers (2017) on *G. oxydans*, which could be used repeatedly for  
18 xylonate production in a bioreactor with an improved oxygen delivery system. Such cell  
19 recycling can be a promising strategy offering high xylonate yield and reduced process costs.

20 Since oxygen availability may become a bottleneck for the xylose-to-xylonate conversion, we  
21 next examined the effect of improved aeration through increased agitation of *P. putida* resting  
22 cells. In Zhou *et al.* (2017), the increase in agitation speed from 300 to 500 rpm enhanced the  
23 accumulation of xylonate by 25%. To check whether we could observe the same trend, we  
24 incubated resting cells in minimal medium with 5 g L<sup>-1</sup> xylose at agitation of 170 or 300 rpm  
25 and the level of xylose conversion to xylonate was determined after 48 h (Fig. 2C). Xylose

1 oxidation to xylonate was about 10% more efficient in flasks agitated at higher speed.  
2 However, the increase was only marginal.

3 Another variable tested was pH. Xylonate accumulation results in acidification of the medium  
4 and low pH can inhibit the activity of glucose dehydrogenase, as shown previously for *P. fragi*  
5 (Buchert *et al.*, 1986). To inspect the effect of pH, we increased the buffering capacity of the  
6 M9 medium by mixing it with 100 mM sodium phosphate buffer while escalating glucose  
7 concentration to 10 g L<sup>-1</sup> to intensify acidification. As shown in Fig. 2C, in these conditions  
8 EM42 cells ( $A_{600} = 1.0$ ) gave rise to  $9.67 \pm 0.39$  g L<sup>-1</sup> of xylonate after 48 h, while  $8.50 \pm 0.43$   
9 g L<sup>-1</sup> of xyloic acid were detected in supernatants of non-buffered cultures (Fig. 2C). The final  
10 pH determined in buffered ( $5.92 \pm 0.03$ ) and non-buffered ( $4.53 \pm 0.12$ ) cultures proved that  
11 the sodium phosphate buffer of used concentration could efficiently prevent excessive pH drop.  
12 These observations on culture conditions were considered for increasing the efficiency of  
13 xylose conversion to xylonate in subsequent experiments with growing *P. putida* cells.

14

### 15 ***Xylose biotransformation to xylonate by P. putida EM42 growing on glucose or cellobiose***

16 In none of the experiments mentioned above xylose oxidation to xylonate was tested during  
17 growth. Instead, the transformation experiments were preceded by the production of whole-  
18 cell catalyst biomass. Similarly to other naturally occurring or recombinant xylonate producers  
19 (Nygård *et al.*, 2011; M. Toivari *et al.*, 2012; Wang *et al.*, 2016; Zhou *et al.*, 2017; Gao *et al.*,  
20 2019) *P. putida* was grown in a medium rich in amino acids and vitamins, namely in LB (La  
21 Rosa *et al.*, 2016). However, such complex media are expensive and thus unsuitable for large-  
22 scale bioprocesses. As an alternative, the growth of xylonate producing microorganism on low-  
23 cost carbon source derived *e.g.*, from lignocellulosic materials, would be desirable. D-glucose  
24 is the most abundant monomeric sugar in lignocellulosic hydrolysates prepared by using



1 commercial enzyme cocktails with endoglucanase, exoglucanase, and  $\beta$ -glucosidase (Taha *et*  
2 *al.*, 2016) and it is also a good growth substrate for *P. putida* (del Castillo *et al.*, 2007).  
3 However, glucose is a preferred substrate for glucose dehydrogenase and might thus inhibit  
4 xylose oxidation by this enzyme. Figure 3A shows that this is exactly the case, *P. putida* EM42  
5 cultured in minimal medium with 5 g L<sup>-1</sup> glucose did not oxidise xylose during the first eight  
6 hours of the experiment, *i.e.* when glucose was consumed by the cells. As a consequence, the  
7 production of xylonate (which occurred concomitantly with growth) was postponed and less  
8 than 20 % of xylose was oxidised to the acid at the end of the two-day culture (Table 1).  
9 Inhibition of xylose transformation to xylonate by glucose was confirmed in an additional  
10 experiment using an increased concentration of the hexose (10 g L<sup>-1</sup>, Supplementary Fig. S2).  
11 We attempted to bypass this bottleneck by employing D-cellobiose as an alternative growth  
12 substrate for *P. putida*. D-cellobiose is a disaccharide composed of two  $\beta$ -glucose monomers  
13 linked by a  $\beta(1\rightarrow4)$  bond. It is a by-product of cellulose saccharification with standard  
14 commercial mixtures of cellulases but becomes a predominant product when  $\beta$ -glucosidase is  
15 omitted from the cocktail (Chen, 2015). Well-defined microbial hosts capable of efficient  
16 cellobiose utilisation are therefore desirable because they can be applied in simultaneous  
17 saccharification and fermentation of cellulose for production of VAC while the process cost is  
18 reduced as addition of expensive  $\beta$ -glucosidase is not needed (Ha *et al.*, 2011; Chen, 2015;  
19 Parisutham *et al.*, 2017).  
20 Previous work revealed that a recombinant *P. putida* EM42 derivative which expressed  $\beta$ -  
21 glucosidase gene *bglC* from *T. fusca* grew rapidly on D-cellobiose as a sole carbon source (Fig.  
22 1; Dvořák and de Lorenzo, 2018). In this case, cellobiose enters *P. putida* cells through the  
23 glucose ABC transporter and it is then cleaved by BglC to two glucose molecules which are  
24 further processed in the cytoplasm. The peripheral glucose oxidative pathway probably does  
25 not play a role in cellobiose uptake. Hence, it was presumed that cellobiose could be used

1 instead of glucose as a growth substrate for *P. putida* while xylose would be oxidised by non-  
2 occupied Gcd (Fig. 1). To test this hypothesis, we cultured *P. putida* EM42 pSEVA2213\_ *bglC*  
3 in minimal medium with 5 g L<sup>-1</sup> cellobiose and 10 g L<sup>-1</sup> xylose. Cellobiose was consumed  
4 within the initial 24 h of the culture under conditions described in the legend of Figure 3. No  
5 glucose was detected in the medium. During the same time interval, 2.75 ± 0.42 g L<sup>-1</sup> of  
6 xylonate were produced from xylose with average volumetric productivity 114 mg L<sup>-1</sup> h<sup>-1</sup>  
7 which was 65 % higher than in the culture on glucose (Table 1). Xylose oxidation was fastest  
8 during the initial 32 h of the exponential growth phase and then slowed down in the stationary  
9 phase. Xylonate yield at the end of the two-day experiment was 0.48 ± 0.09 g g<sup>-1</sup> xylose. Minor  
10 quantities of xylonolactone were detected in supernatant during the whole course of the culture  
11 (Fig. 3B). Xylonate production and cellular growth were accompanied by acidification of the  
12 medium: the pH decreased from 7.00 ± 0.00 to 6.16 ± 0.06 and 5.19 ± 0.03 after 24 and 48 h  
13 of culture, respectively.

14 The xylonate productivity after initial 24 h of the exponential growth further increased 1.26-  
15 fold (to 144 mg L<sup>-1</sup> h<sup>-1</sup>) when the *bglC*<sup>+</sup> *P. putida* EM42 strain was pre-grown in minimal  
16 medium with cellobiose and cultured in the modified conditions used previously with resting  
17 cells (100 mM sodium phosphate buffer and 300 rpm; Fig. 3C and Table 1). Then, the cells  
18 entered the stationary growth phase and xylonate production during the additional 24 h of  
19 culture was comparable with the former experiment with cells grown in standard M9 medium  
20 at 170 rpm. This cannot be attributed to pH because the buffering of the medium was more  
21 efficient (Table 1). We argue that suboptimal oxygen supply in shake flasks might be the  
22 limiting factor preventing efficient xylose oxidation by dense culture in the stationary period.  
23 In any case, these experiments indicate that cellobiose, an abundant cellulosic carbohydrate,  
24 does not inhibit xylose oxidation to xylonate in *P. putida* and can thus be used as a growth  
25 substrate for cells performing this biotransformation.

## 1 ***Co-production of xylonate and PHA by P. putida EM42 grown on cellobiose***

2 The ability of *P. putida* to both metabolize cellobiose in the cytoplasm and oxidize xylose by  
3 the periplasmic pathway paved the way for parallel co-production of the two biotechnologically  
4 relevant compounds – xylonate and mcl-PHA. The mcl-PHA have been reported to be co-  
5 produced with alginate oligosaccharides from glucose or glycerol (Guo *et al.*, 2011;  
6 Licciardello *et al.*, 2016) or with rhamnolipids from fatty acids (Hori *et al.*, 2011). Also, D-  
7 xylonic acid was generated simultaneously with xylitol or bioethanol from xylose and glucose  
8 (Wiebe *et al.*, 2015; Zhu *et al.*, 2019). However, the synthesis of mcl-PHA along with the  
9 release of xylonate has not yet been reported. To this end, we first examined the formation of  
10 PHA granules in cellobiose-grown *P. putida* cells. As shown in Supplementary Figure S2, flow  
11 cytometry and confocal microscopy identified PHA in the bacteria (Experimental procedures  
12 and Results and discussion in Supporting information).

13 This simple test indicated that *P. putida* EM42 *bglC*<sup>+</sup> metabolized cellobiose to the monomeric  
14 glucose, then to acetyl-CoA and next channeled this metabolic intermediate towards the  
15 formation of the polymer. In order to verify that PHA could be generated along with xylonate  
16 production, the *bglC*<sup>+</sup> strain was pre-cultured in nitrogen-rich LB medium (to avoid any PHA  
17 accumulation) and then grown in nitrogen-limited M9 medium with 100 mM sodium phosphate  
18 buffer, 5 g L<sup>-1</sup> cellobiose, and 10 g L<sup>-1</sup> xylose (Fig. 4). Sugar and xylonic acid concentrations  
19 were determined in culture supernatants while intracellular PHA formation was followed by  
20 flow cytometry and confocal microscopy. As shown in Figures 4A, 4B, and 4C, xylonate and  
21 PHA were produced simultaneously during the initial 48 h of the three-day experiment.  
22 Cellular polymer content increased during the first two days and then declined towards the end  
23 of the experiment (Figs. 4B and 4C). This trend correlated with the presence of the carbon  
24 source (cellobiose and glucose) in the medium (Fig. 4A). As in previous experiments,  
25 cellobiose was almost completely consumed within the initial 24 h. However, uptake of the

1 disaccharide was this time accompanied by the appearance of glucose in the medium, which  
2 reached its maximum concentration ( $1.61 \pm 0.37 \text{ g L}^{-1}$ ) at 12 h of the culture. Under these  
3 circumstances, it became apparent that the secreted glucose affected xylose oxidation by Gcd;  
4 only ~ 25 % of the pentose was converted to xylonate at the end of the experiment. Although  
5 we do not have a trivial explanation for such unexpected release of glucose, we speculate that  
6 it could be due to [i] slower growth ( $\mu = 0.19 \pm 0.01 \text{ h}^{-1}$ ) under nitrogen limitation as compared  
7 to the standard M9 medium ( $\mu = 0.30 \pm 0.02 \text{ h}^{-1}$ ; Fig. 3C) and/or [ii] an imbalance between the  
8 knocked-in BglC  $\beta$ -glucosidase and the innate Glk glucokinase (PP1011) activities stemming  
9 from difference in composition of pre-culture (LB) and culture (M9 with cellobiose) medium  
10 (see a scrutiny of these possibilities in Results and discussion, Experimental procedures, and  
11 Fig. S4 in Supporting information).

12 To overcome this bottleneck, *P. putida* EM42 *bglC*<sup>+</sup> cells were pre-grown overnight in standard  
13 M9 medium with  $5 \text{ g L}^{-1}$  cellobiose instead of LB. Faster growth of the main cultures ( $\mu =$   
14  $0.24 \pm 0.01 \text{ h}^{-1}$ ) in the nitrogen-limited M9 medium with cellobiose and xylose was then indeed  
15 observed and only minute concentrations of glucose (up to  $0.12 \text{ g L}^{-1}$ ) were detected in the  
16 supernatants during first 24 h (Fig. 4D). As a consequence, the volumetric productivity of  
17 xylonate during this period increased 3.5-fold (from  $44 \pm 18 \text{ mg L}^{-1} \text{ h}^{-1}$  to  $156 \pm 32 \text{ mg L}^{-1} \text{ h}^{-1}$ )  
18 when compared with the previous experiment shown in Fig. 4A. Xylonate yield was 2.4-times  
19 higher and reached  $0.52 \pm 0.08 \text{ g g}^{-1}$  xylose after 48 h of the culture (Table 1). Interestingly, the  
20 xylonate yield per gram of cell dry weight was 1.7-fold higher compared to the cells growing  
21 faster and reaching higher OD<sub>600</sub> in M9 medium with standard nitrogen content (Fig. 3C, Table  
22 1).

23 The same cultures were stopped after 48 h to quantify also PHA content within the cells which  
24 turned out to be 21 % (w/w) of cell dry weight. The biopolymer yield was  $0.05 \pm 0.01 \text{ g g}^{-1}$   
25 cellobiose. These values are close to those reported for *P. putida* KT2440 grown on glucose

1 (Huijberts *et al.*, 1992; Poblete-Castro *et al.*, 2013). The yield of PHA per 1 L of the cell culture  
2 in the shake flask reached  $0.26 \pm 0.03$  g. The monomer composition of the analysed biopolymer  
3 was also consistent with the previous reports on mcl-PHA production from glucose (Fig. 4E).  
4 The major fraction ( $> 75$  %) was formed by 3-hydroxydecanoate, followed by 3-  
5 hydroxyoctanoate, 3-hydroxydodecanoate, and small amount of 3-hydroxyhexanoate. Taken  
6 together, the above experiments confirmed the co-production of two value-added molecules  
7 (xylonate and mcl-PHA) out of xylose and cellobiose in *P. putida*.

8

## 9 **Conclusion**

10 In this work, we have exploited the metabolic versatility of *P. putida* EM42, a robust derivative  
11 of *P. putida* KT2440, for prototyping the simultaneous conversion of xylose and cellobiose  
12 into xylonate and mcl-PHA. Periplasmic oxidation of D-xylose to D-xylonic acid was first  
13 assayed with recyclable *P. putida* EM42 resting cells. Rapid transformation of pentose into free  
14 xylonate with only minor accumulation of xylonolactone intermediate was observed. Such  
15 extracytoplasmic production and secretion are advantageous over intracellular xylose  
16 oxidation: cytoplasm acidification is avoided, the reaction of interest does not cross-interfere  
17 with the host's metabolism, and xylonate can be purified directly from the culture medium  
18 (Wang *et al.*, 2016).

19 We then demonstrated that xylose conversion to xylonate can be efficiently catalysed also by  
20 recombinant *P. putida* EM42 *bglC*<sup>+</sup> growing on D-cellobiose. In contrast to monomeric  
21 glucose, which is a preferred substrate for glucose dehydrogenase in *P. putida*, the disaccharide  
22 did not compete with xylose for Gcd and was a better carbon source for growth-associated  
23 xylonate production. Importantly, cellobiose-grown *P. putida* was able to stream the carbon  
24 from disaccharide into the intracellular mcl-PHA and concomitantly oxidize xylose to

1 xylonate. Both xylonate and PHA yields could be further increased not only through bioprocess  
2 design but also by additional genetic interventions in the host that are known to improve the  
3 two bioproductions separately. This includes *e.g.*, overexpression of genes encoding the  
4 periplasmic oxidative pathway (Yu *et al.* 2018) and/or overexpression of pyruvate  
5 dehydrogenase gene *acoA* (Borrero-de Acuña *et al.*, 2014). These optimisation efforts will be  
6 the subject of our further work. In any case, bioprocesses based on microbial hosts capable of  
7 parallel production of two or more VAC from cheap abundant substrates are drawing  
8 considerable attention (Dumon *et al.*, 2012; Li *et al.*, 2017; Larroude *et al.*, 2018; Baral *et al.*,  
9 2019; Wang *et al.*, 2019). We argue that the strategy shown here on example of recombinant  
10 *P. putida* EM42 expressing cytoplasmic  $\beta$ -glucosidase represents a promising route for  
11 valorisation of (hemi)cellulosic residues and an alternative to the xylonate and mcl-PHA  
12 bioproductions reported thus far.

13

14

15

16

17

18

19

20

21

22

## 1 **Acknowledgments**

2 We thank Prof. Ivana Márová and Assoc. Prof. Stanislav Obruča from Brno University of  
3 Technology for the valuable discussions and provided know-how and infrastructure for PHA  
4 quantification and characterization. This work was funded by the SETH Project of the Spanish  
5 Ministry of Science (RTI 2018-095584-B-C42), MADONNA (H2020-FET-OPEN-RIA-2017-  
6 1-766975), BioRoboost (H2020-NMBP-BIO-CSA-2018), and SYN BIO4FLAV (H2020-  
7 NMBP/0500), contracts of the European Union and the S2017/BMD-3691 InGEMICS-CM  
8 funded by the Comunidad de Madrid (European Structural and Investment Funds) as well as  
9 by the Czech Science Foundation (19-06511Y).

10

## 11 **Conflict of interest**

12 The authors declare that they have no conflict of interest.

13

14

15

16

17

18

19

20

21

## 1   **References**

- 2   Baral, N.R., Sundstrom, E.R., Das, L., Gladden, J., Eudes, A., Mortimer, J.C., *et al.* (2019)  
3       Approaches for More Efficient Biological Conversion of Lignocellulosic Feedstocks to  
4       Biofuels and Bioproducts. *ACS Sustainable Chem Eng* **7**: 9062–9079.
- 5   Belda, E., van Heck, R.G.A., José Lopez-Sanchez, M., Cruveiller, S., Barbe, V., Fraser, C., *et*  
6       *al.* (2016) The revisited genome of *Pseudomonas putida* KT2440 enlightens its value  
7       as a robust metabolic chassis. *Environ Microbiol* **18**: 3403–3424.
- 8   Borrero-de Acuña, J.M., Bielecka, A., Häussler, S., Schobert, M., Jahn, M., Wittmann, C., *et*  
9       *al.* (2014) Production of medium chain length polyhydroxyalkanoate in metabolic flux  
10      optimized *Pseudomonas putida*. *Microb Cell Fact* **13**: 88.
- 11  Buchert, J., Puls, J., and Poutanen, K. (1988) Comparison of *Pseudomonas fragi* and  
12      *Gluconobacter oxydans* for production of xylonic acid from hemicellulose  
13      hydrolyzates. *Appl Microbiol Biotechnol* **28**: 367–372.
- 14  Buchert, J. and Viikari, L. (1988) The role of xylonolactone in xylonic acid production by  
15      *Pseudomonas fragi*. *Appl Microbiol Biotechnol* **27**: 333–336.
- 16  Buchert, J., Viikari, L., Linko, M., and Markkanen, P. (1986) Production of xylonic acid by  
17      *Pseudomonas fragi*. *Biotechnol Lett* **8**: 541–546.
- 18  del Castillo, T., Ramos, J.L., Rodríguez-Herva, J.J., Fuhrer, T., Sauer, U., and Duque, E. (2007)  
19      Convergent peripheral pathways catalyze initial glucose catabolism in *Pseudomonas*  
20      *putida*: genomic and flux analysis. *J Bacteriol* **189**: 5142–5152.
- 21  Chen, G.-Q. (2009) A microbial polyhydroxyalkanoates (PHA) based bio- and materials  
22      industry. *Chem Soc Rev* **38**: 2434–2446.
- 23  Chen, R. (2015) A paradigm shift in biomass technology from complete to partial cellulose  
24      hydrolysis: lessons learned from nature. *Bioengineered* **6**: 69–72.



- 1 Dumon, C., Song, L., Bozonnet, S., Fauré, R., and O'Donohue, M.J. (2012) Progress and future  
2 prospects for pentose-specific biocatalysts in biorefining. *Process Biochem* **47**: 346–  
3 357.
- 4 Dvořák, P. and de Lorenzo, V. (2018) Refactoring the upper sugar metabolism of *Pseudomonas*  
5 *putida* for co-utilization of cellobiose, xylose, and glucose. *Metab Eng* **48**: 94–108.
- 6 Gao, C., Hou, J., Xu, P., Guo, L., Chen, X., Hu, G., *et al.* (2019) Programmable biomolecular  
7 switches for rewiring flux in *Escherichia coli*. *Nat Commun* **10**: 3751.
- 8 Guo, W., Song, C., Kong, M., Geng, W., Wang, Y., and Wang, S. (2011) Simultaneous  
9 production and characterization of medium-chain-length polyhydroxyalkanoates and  
10 alginate oligosaccharides by *Pseudomonas mendocina* NK-01. *Appl Microbiol*  
11 *Biotechnol* **92**: 791–801.
- 12 Ha, S.-J., Galazka, J.M., Kim, S.R., Choi, J.-H., Yang, X., Seo, J.-H., *et al.* (2011) Engineered  
13 *Saccharomyces cerevisiae* capable of simultaneous cellobiose and xylose fermentation.  
14 *Proc Natl Acad Sci U S A* **108**: 504–509.
- 15 Hardy, G.P., Teixeira de Mattos, M.J., and Neijssel, O.M. (1993) Energy conservation by  
16 pyrroloquinoline quinol-linked xylose oxidation in *Pseudomonas putida* NCTC 10936  
17 during carbon-limited growth in chemostat culture. *FEMS Microbiol Lett* **107**: 107–  
18 110.
- 19 Huijberts, G.N., Eggink, G., de Waard, P., Huisman, G.W., and Witholt, B. (1992)  
20 *Pseudomonas putida* KT2442 cultivated on glucose accumulates poly(3-  
21 hydroxyalkanoates) consisting of saturated and unsaturated monomers. *Appl Environ*  
22 *Microbiol* **58**: 536–544.
- 23 Jayakody, L.N., Johnson, C.W., Whitham, J.M., Giannone, R.J., Black, B.A., Cleveland, N.S.,  
24 *et al.* (2018) Thermochemical wastewater valorization via enhanced microbial toxicity  
25 tolerance. *Energy Environ Sci* **11**: 1625–1638.

- 1 Kawaguchi, H., Hasunuma, T., Ogino, C., and Kondo, A. (2016) Bioprocessing of bio-based  
2 chemicals produced from lignocellulosic feedstocks. *Curr Opin Biotechnol* **42**: 30–39.
- 3 Köhler, K.A.K., Blank, L.M., Frick, O., and Schmid, A. (2015) D-Xylose assimilation via the  
4 Weimberg pathway by solvent-tolerant *Pseudomonas taiwanensis* VLB120. *Environ*  
5 *Microbiol* **17**: 156–170.
- 6 La Rosa, R., Behrends, V., Williams, H.D., Bundy, J.G., and Rojo, F. (2016) Influence of the  
7 Crc regulator on the hierarchical use of carbon sources from a complete medium in  
8 *Pseudomonas*. *Environ Microbiol* **18**: 807–818.
- 9 Larroude, M., Celinska, E., Back, A., Thomas, S., Nicaud, J.-M., and Ledesma-Amaro, R.  
10 (2018) A synthetic biology approach to transform *Yarrowia lipolytica* into a  
11 competitive biotechnological producer of  $\beta$ -carotene. *Biotechnol Bioeng* **115**: 464–472.
- 12 Li, T., Elhadi, D., and Chen, G.-Q. (2017) Co-production of microbial polyhydroxyalkanoates  
13 with other chemicals. *Metab Eng* **43**: 29–36.
- 14 Licciardello, G., Ferraro, R., Russo, M., Strozzi, F., Catara, A.F., Bella, P., and Catara, V.  
15 (2017) Transcriptome analysis of *Pseudomonas mediterranea* and *P. corrugata* plant  
16 pathogens during accumulation of medium-chain-length PHAs by glycerol  
17 bioconversion. *N Biotechnol* **37**: 39–47.
- 18 Lien, O.G. (1959) Determination of Gluconolactone, Galactonolactone, and Their Free Acids  
19 by Hydroxamate Method. *Anal Chem* **31**: 1363–1366.
- 20 Linger, J.G., Hobdey, S.E., Franden, M.A., Fulk, E.M., and Beckham, G.T. (2016) Conversion  
21 of levoglucosan and cellobiosan by *Pseudomonas putida* KT2440. *Metab Eng Commun*  
22 **3**: 24–29.
- 23 Linger, J.G., Vardon, D.R., Guarneri, M.T., Karp, E.M., Hunsinger, G.B., Franden, M.A., *et*  
24 *al.* (2014) Lignin valorization through integrated biological funneling and chemical  
25 catalysis. *Proc Natl Acad Sci U S A* **111**: 12013–12018.

- 1 Liu, H., Valdehuesa, K.N.G., Nisola, G.M., Ramos, K.R.M., and Chung, W.-J. (2012) High  
2 yield production of D-xylonic acid from D-xylose using engineered *Escherichia coli*.  
3 *Bioresour Technol* **115**: 244–248.
- 4 Loeschcke, A. and Thies, S. (2015) *Pseudomonas putida*-a versatile host for the production of  
5 natural products. *Appl Microbiol Biotechnol* **99**: 6197–6214.
- 6 Löwe, H., Sinner, P., Kremling, A., and Pflüger-Grau, K. (2018) Engineering sucrose  
7 metabolism in *Pseudomonas putida* highlights the importance of porins. *Microb*  
8 *Biotechnol* doi: 10.1111/1751-7915.13283
- 9 Marsudi, S., Unno, H., and Hori, K. (2008) Palm oil utilization for the simultaneous production  
10 of polyhydroxyalkanoates and rhamnolipids by *Pseudomonas aeruginosa*. *Appl*  
11 *Microbiol Biotechnol* **78**: 955–961.
- 12 Martínez-García, E., Nickel, P.I., Aparicio, T., and de Lorenzo, V. (2014) *Pseudomonas* 2.0:  
13 genetic upgrading of *P. putida* KT2440 as an enhanced host for heterologous gene  
14 expression. *Microb Cell Factories* **13**: 159.
- 15 Mehtiö, T., Toivari, M., Wiebe, M.G., Harlin, A., Penttilä, M., and Koivula, A. (2016)  
16 Production and applications of carbohydrate-derived sugar acids as generic biobased  
17 chemicals. *Crit Rev Biotechnol* **36**: 904–916.
- 18 Meijnen, J.-P., de Winde, J.H., and Ruijssenaars, H.J. (2008) Engineering *Pseudomonas putida*  
19 S12 for efficient utilization of D-xylose and L-arabinose. *Appl Environ Microbiol* **74**:  
20 5031–5037.
- 21 Mosier, N., Wyman, C., Dale, B., Elander, R., Lee, Y.Y., Holtzapple, M., and Ladisch, M.  
22 (2005) Features of promising technologies for pretreatment of lignocellulosic biomass.  
23 *Bioresour Technol* **96**: 673–686.
- 24 Nickel, P.I. and de Lorenzo, V. (2018) *Pseudomonas putida* as a functional chassis for industrial  
25 biocatalysis: From native biochemistry to trans-metabolism. *Metab Eng* **50**: 142-155.

- 1 Nygård, Y., Toivari, M.H., Penttilä, M., Ruohonen, L., and Wiebe, M.G. (2011) Bioconversion  
2 of d-xylose to d-xylonate with *Kluyveromyces lactis*. *Metab Eng* **13**: 383–391.
- 3 Nygård, Y., Maaheimo, H., Mojzita, D., Toivari, M., Wiebe, M., Resnekov, O., *et al.* (2014)  
4 Single cell and *in vivo* analyses elucidate the effect of *xylC* lactonase during production  
5 of D-xylonate in *Saccharomyces cerevisiae*. *Metab Eng* **25**: 238–247.
- 6 Parisutham, V., Chandran, S.-P., Mukhopadhyay, A., Lee, S.K., and Keasling, J.D. (2017)  
7 Intracellular cellobiose metabolism and its applications in lignocellulose-based  
8 biorefineries. *Bioresour Technol* **239**: 496–506.
- 9 Poblete-Castro, I., Becker, J., Dohnt, K., dos Santos, V.M., and Wittmann, C. (2012) Industrial  
10 biotechnology of *Pseudomonas putida* and related species. *Appl Microbiol Biotechnol*  
11 **93**: 2279–2290.
- 12 Poblete-Castro, I., Binger, D., Rodrigues, A., Becker, J., Martins Dos Santos, V.A.P., and  
13 Wittmann, C. (2013) *In-silico*-driven metabolic engineering of *Pseudomonas putida* for  
14 enhanced production of poly-hydroxyalkanoates. *Metab Eng* **15**: 113–123.
- 15 Prieto, A., Escapa, I.F., Martínez, V., Dinjaski, N., Herencias, C., de la Peña, F., *et al.* (2016)  
16 A holistic view of polyhydroxyalkanoate metabolism in *Pseudomonas putida*. *Environ*  
17 *Microbiol* **18**: 341–357.
- 18 Searles, S. and Malins, C. (2013) ICCT White Paper. Availability of cellulosic residues and  
19 wastes in the EU. [WWW document]. URL  
20 [https://www.theicct.org/sites/default/files/publications/ICCT\\_EUcellulosic-waste-](https://www.theicct.org/sites/default/files/publications/ICCT_EUcellulosic-waste-residues_20131022.pdf)  
21 [residues\\_20131022.pdf](https://www.theicct.org/sites/default/files/publications/ICCT_EUcellulosic-waste-residues_20131022.pdf)
- 22 Silva-Rocha, R., Martínez-García, E., Calles, B., Chavarría, M., Arce-Rodríguez, A., de Las  
23 Heras, A., *et al.* (2013) The Standard European Vector Architecture (SEVA): a coherent  
24 platform for the analysis and deployment of complex prokaryotic phenotypes. *Nucleic*  
25 *Acids Res* **41**: D666-675.

- 1 Taha, M., Foda, M., Shahsavari, E., Aburto-Medina, A., Adetutu, E., and Ball, A. (2016)  
2 Commercial feasibility of lignocellulose biodegradation: possibilities and challenges.  
3 *Curr Opin Biotechnol* **38**: 190–197.
- 4 Toivari, M., Nygård, Y., Kumpula, E.-P., Vehkomäki, M.-L., Benčina, M., Valkonen, M., et  
5 al. (2012) Metabolic engineering of *Saccharomyces cerevisiae* for bioconversion of D-  
6 xylose to D-xylonate. *Metab Eng* **14**: 427–436.
- 7 Toivari, M.H., Nygård, Y., Penttilä, M., Ruohonen, L., and Wiebe, M.G. (2012) Microbial D-  
8 xylonate production. *Appl Microbiol Biotechnol* **96**: 1–8.
- 9 Udaondo, Z., Ramos, J.-L., Segura, A., Krell, T., and Daddaoua, A. (2018) Regulation of  
10 carbohydrate degradation pathways in *Pseudomonas* involves a versatile set of  
11 transcriptional regulators. *Microb Biotechnol* **11**: 442–454.
- 12 Wang, C., Wei, D., Zhang, Z., Wang, D., Shi, J., Kim, C.H., et al. (2016) Production of xylonic  
13 acid by *Klebsiella pneumoniae*. *Appl Microbiol Biotechnol* **100**: 10055–10063.
- 14 Wang, Y., Ling, C., Chen, Y., Jiang, X., and Chen, G.-Q. (2019) Microbial engineering for  
15 easy downstream processing. *Biotechnol Adv* 107365.
- 16 Werpy, T. and Petersen, G. (2004) Top Value Added Chemicals from Biomass: Volume I -  
17 Results of Screening for Potential Candidates from Sugars and Synthesis Gas. doi:  
18 10.2172/15008859.
- 19 Wiebe, M.G., Nygård, Y., Oja, M., Andberg, M., Ruohonen, L., Koivula, A., et al. (2015) A  
20 novel aldose-aldose oxidoreductase for co-production of D-xylonate and xylitol from  
21 D-xylose with *Saccharomyces cerevisiae*. *Appl Microbiol Biotechnol* **99**: 9439–9447.
- 22 Yu, S., Lai, B., Plan, M.R., Hodson, M.P., Lestari, E.A., Song, H., Krömer, J.O. (2018)  
23 Improved performance of *Pseudomonas putida* in a bioelectrochemical system through  
24 overexpression of periplasmic glucose dehydrogenase. *Biotechnol Bioeng.* **115**:145-  
25 155.

1 Zhou, Xin, Zhou, Xuelian, and Xu, Y. (2017) Improvement of fermentation performance of  
2 *Gluconobacter oxydans* by combination of enhanced oxygen mass transfer in  
3 compressed-oxygen-supplied sealed system and cell-recycle technique. *Bioresour*  
4 *Technol* **244**: 1137–1141.

5

6

7

8

9

10

11

12

13

14

15

16

17

18

19

20

21

22

23

24

1 **Tables**

2 **Table 1.** Parameters determined in the cultures with *Pseudomonas putida* EM42 or *P. putida*  
 3 EM42 pSEVA2213\_ *bglC* grown on D-glucose or D-cellobiose, respectively, and transforming  
 4 D-xylose to D-xylonic acid. Values represent the mean  $\pm$  standard deviation of three biological  
 5 replicates. Parameters (except for  $\mu$ ) were determined after 24 h / 48 h of the culture.

| <i>P. putida</i> strain and culture conditions  | $\mu$ (h <sup>-1</sup> ) <sup>c</sup> | Xylonate yield (g g <sup>-1</sup> xylose) | Xylonate productivity (mg L <sup>-1</sup> h <sup>-1</sup> ) | CDW (g)                             | pH                                  |
|-------------------------------------------------|---------------------------------------|-------------------------------------------|-------------------------------------------------------------|-------------------------------------|-------------------------------------|
| EM42 glucose                                    | 0.58 $\pm$ 0.02                       | 0.18 $\pm$ 0.02/<br>0.17 $\pm$ 0.03       | 69 $\pm$ 6/<br>32 $\pm$ 6                                   | 1.73 $\pm$ 0.12/<br>1.60 $\pm$ 0.06 | 6.26 $\pm$ 0.01/<br>5.81 $\pm$ 0.03 |
| <i>bglC</i> + EM42 cellobiose                   | 0.27 $\pm$ 0.03                       | 0.30 $\pm$ 0.06/<br>0.48 $\pm$ 0.09       | 114 $\pm$ 18/<br>93 $\pm$ 13                                | 1.46 $\pm$ 0.13/<br>1.88 $\pm$ 0.05 | 6.16 $\pm$ 0.06/<br>5.19 $\pm$ 0.03 |
| <i>bglC</i> + EM42 cellobiose optA <sup>a</sup> | 0.30 $\pm$ 0.02                       | 0.35 $\pm$ 0.02/<br>0.50 $\pm$ 0.01       | 144 $\pm$ 8/<br>102 $\pm$ 3                                 | 2.41 $\pm$ 0.11/<br>2.18 $\pm$ 0.07 | 6.27 $\pm$ 0.08/<br>6.00 $\pm$ 0.04 |
| <i>bglC</i> + EM42 cellobiose optB <sup>b</sup> | 0.24 $\pm$ 0.01                       | 0.41 $\pm$ 0.09/<br>0.52 $\pm$ 0.08       | 156 $\pm$ 32/<br>99 $\pm$ 13                                | 0.86 $\pm$ 0.02/<br>1.24 $\pm$ 0.14 | 6.24 $\pm$ 0.02/<br>5.90 $\pm$ 0.01 |

6 <sup>a</sup> Cultures were carried out in flasks with M9 minimal medium buffered with 100 mM sodium phosphate buffer  
 7 and shaken at 300 rpm.

8 <sup>b</sup> Cultures were carried out in flasks with M9 minimal medium with reduced content of nitrogen, buffered with  
 9 100 mM sodium phosphate buffer and shaken at 300 rpm.

10 <sup>c</sup> The specific growth rate ( $\mu$ ) was determined during exponential growth.  
 11 CDW, cell dry weight  
 12

13

14

15

16

17

18

19

20

21

22

1 **Figures**

2 **Figure 1. Co-production of D-xylonic acid and medium chain length**  
3 **polyhydroxyalkanoates from D-xylose and D-cellobiose, respectively, in *bglC*+ *P. putida***  
4 **EM42.**

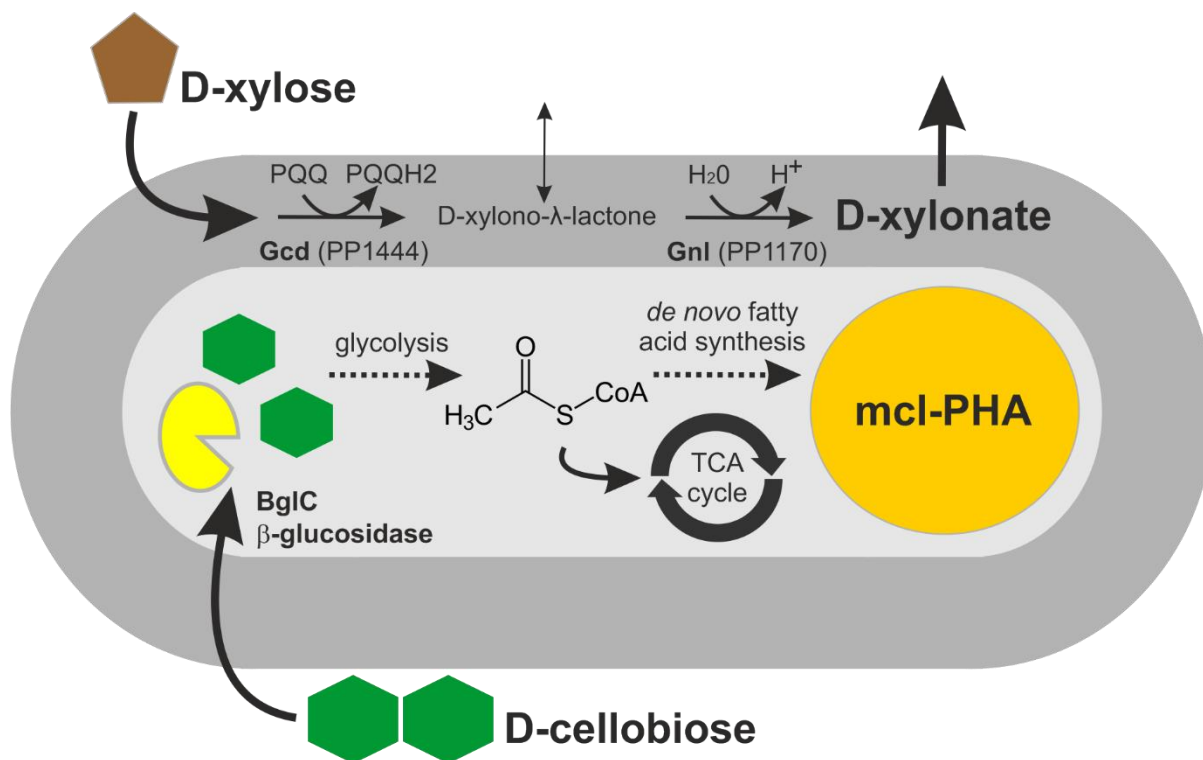

5  
6 Innate periplasmic oxidative route and introduced cytoplasmic  $\beta$ -glucosidase BglC from  
7 *Thermobifida fusca* allow simultaneous valorisation of D-xylose and D-cellobiose in  
8 *Pseudomonas putida* EM42. D-xylose is oxidised to platform chemical D-xylonic acid which  
9 is released into the medium. D-cellobiose, on the other hand, is transported into the cell, cleaved  
10 in two D-glucose molecules by BglC and gives rise to acetyl-CoA, a precursor molecule for  
11 the production of intracellular biopolymers (polyhydroxyalkanoates, PHA) *via de novo* fatty  
12 acid synthesis in nitrogen-limited conditions. Periplasmic space and cytoplasm are shown in  
13 dark and pale grey, respectively. Abbreviations: Gcd, glucose dehydrogenase; Gnl,  
14 gluconolactonase; PQQ and PQQH, pyrroloquinoline quinone and its reduced form,



1 respectively; TCA cycle, tricarboxylic acid cycle; mcl-PHA, medium chain length  
2 polyhydroxyalkanoates.

3

4

5

6

7

8

9

10

11

12

13

14

15

16

17

18

19

20

21

22

23

24

25

1 **Figure 2. Biotransformation of xylose to xylonate by *P. putida* EM42 resting cells**

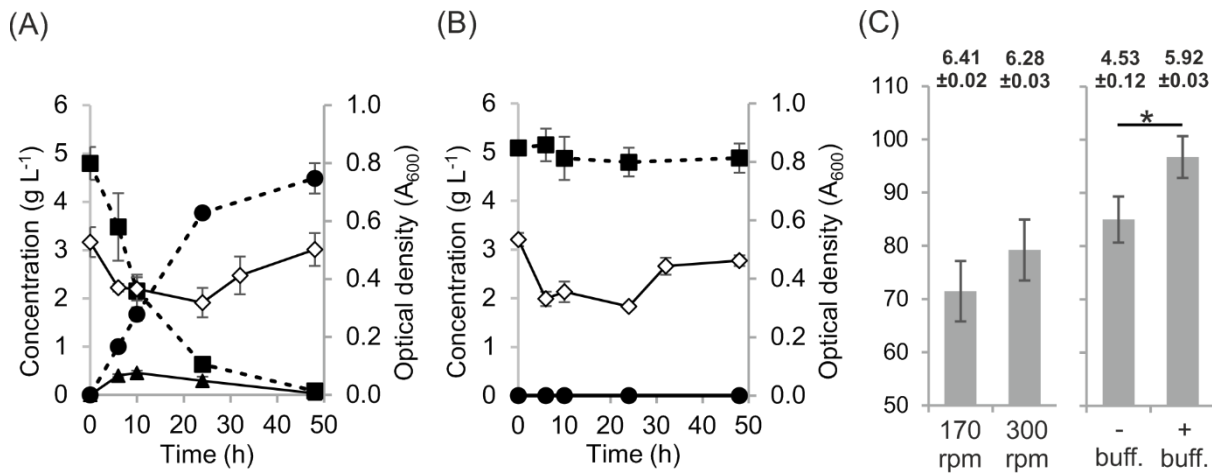

2  
3 Incubation of resting cells of (A) *Pseudomonas putida* EM42 and (B) its deletion mutant *P.*  
4 *putida* EM42  $\Delta$ gcd in minimal medium with 5 g L<sup>-1</sup> D-xylose. Experiments were carried out  
5 in 25 mL of minimal medium in flasks shaken at 170 rpm and 30 °C. Minimal medium was  
6 inoculated to the initial A<sub>600</sub> of 0.5 using cells obtained from an overnight culture in lysogeny  
7 broth. D-xylose, filled squares (■); D-xylonate, filled circles (●); D-xylonolactone, filled  
8 triangles (▲); cell biomass, open diamonds (◇). Data points shown as mean ± SD of three  
9 biological replicates. (C) Effect of agitation speed (left graph) and pH (right graph) on  
10 conversion of xylose to xylonic acid by *P. putida* EM42 resting cells. For evaluation of  
11 agitation speed effect, cells of A<sub>600</sub> = 0.2 were incubated in medium with 5 g L<sup>-1</sup> xylose with  
12 agitation of 170 or 300 rpm and the level of xylose conversion to xylonate was determined after  
13 48 h. For evaluation of pH effect, cells of A<sub>600</sub> = 1.0 were incubated in medium with or without  
14 100 mM sodium phosphate buffer, with 10 g L<sup>-1</sup> xylose and at agitation of 170, the level of  
15 xylose conversion to xylonate was determined after 48 h. The numbers above the columns  
16 show pH of the medium measured at the end of the experiment. Both experiments were carried  
17 out with resting cells collected from overnight cultures in LB medium, washed and re-  
18 suspended in shake flasks with 20 mL of M9 minimal medium. Columns represent means ±

1 SD from at least four biological replicates from two independent experiments. Asterisk denotes  
2 significance in the difference between two means at  $P < 0.01$  as evaluated by Student's  $t$  test.

3

4

5

6

7

8

9

10

11

12

13

14

15

16

17

18

19

20

21

22

1 **Figure 3. Biotransformation of D-xylose to D-xylonate by *P. putida* EM42 growing on D-**  
2 **glucose or D-cellobiose.**

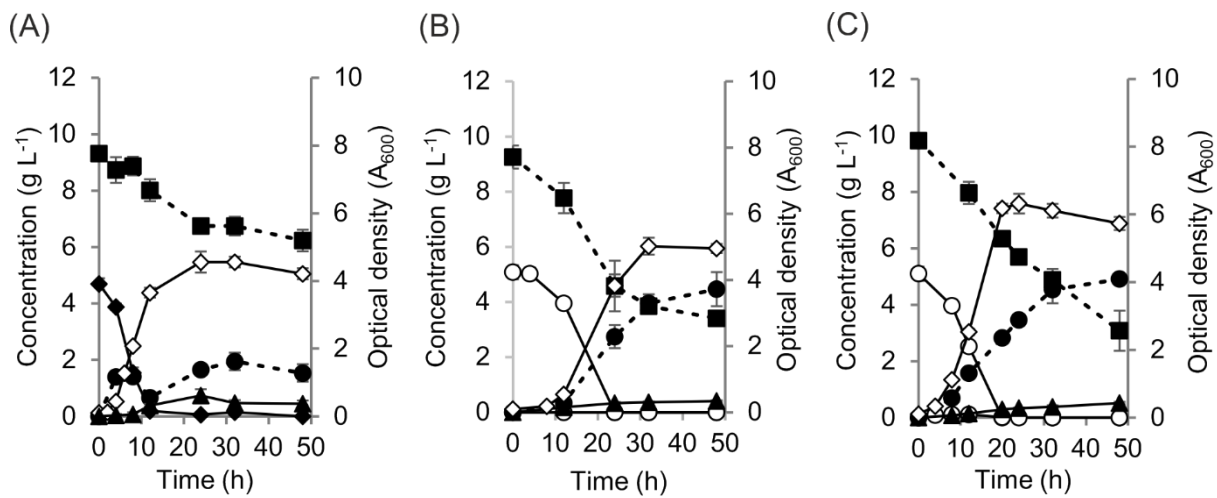

4 Three-day cultures of (A) *Pseudomonas putida* EM42 in minimal medium with 10 g L<sup>-1</sup> D-  
5 xylose and 5 g L<sup>-1</sup> D-glucose used as a sole carbon source for growth. (B,C) Cultures of  
6 *Pseudomonas putida* EM42 pSEVA2213\_bglC in minimal medium with 10 g L<sup>-1</sup> D-xylose  
7 and 5 g L<sup>-1</sup> D-cellobiose used as a sole carbon source. Experiments (A) and (B) carried out in  
8 25 mL of minimal medium in flasks shaken at 170 rpm and 30 °C. Minimal medium was  
9 inoculated to the initial A<sub>600</sub> of 0.1 using cells obtained from an overnight culture in lysogeny  
10 broth. Experiment (C) was performed in flask with 25 mL of minimal medium buffered with  
11 100 mM sodium phosphate buffer and shaken at 300 rpm (30 °C). Cells used for inoculation  
12 of the main culture to the initial A<sub>600</sub> of 0.1 were pre-grown overnight in minimal medium with  
13 5 g L<sup>-1</sup> D-cellobiose. D-xylose, filled squares (■); D-xylonate, filled circles (●); D-xylono-λ-  
14 lactone, filled triangles (▲); D-glucose, filled diamonds (◆); D-cellobiose, open circles (○);  
15 cell biomass, open diamonds (◇). Data points shown as mean ± SD of three biological  
16 replicates. Please, note that the elevated xylonate concentrations detected after 4 and 8 h in the  
17 culture (A) do not reflect the real levels of the xylose oxidation product. Hydroxamate method  
18 (Lien, 1959) used here for xylonate quantification was originally designed for the detection of  
19 gluconate, which temporarily accumulated in the culture medium during glucose utilisation in

1 (A). Accumulation of gluconate at the times 4 and 8 h was verified also by the specific D-  
2 Gluconic Acid/D-Glucono- $\delta$ -lactone Assay Kit (Megazyme, data not shown).

3

4

5

6

7

8

9

10

11

12

13

14

15

16

17

18

19

20

21

22

23

24

- 1 **Figure 4. Co-production of D-xylonic acid and PHA from D-xylose and D-cellobiose,**
- 2 **respectively, by cellobiose grown *P. putida* EM42 pSEVA2213\_ *bglC*.**

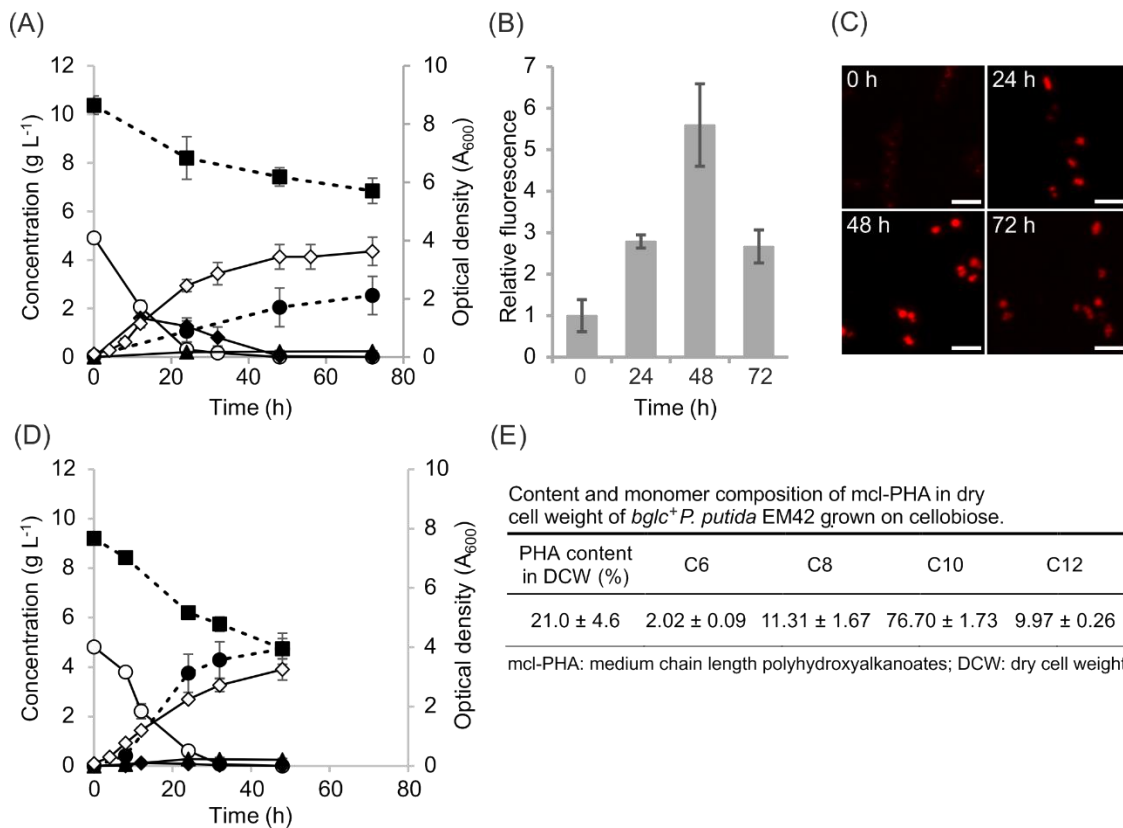

3

- 4 (A) Initial culture inoculated from overnight pre-culture in lysogeny broth was carried out in
- 5 25 mL of nitrogen-limited M9 minimal medium with 100 mM sodium phosphate buffer, 5 g L<sup>-1</sup>
- 6 <sup>1</sup> cellobiose, and 10 g L<sup>-1</sup> xylose in flasks shaken at 300 rpm and 30 °C. (B) Relative
- 7 fluorescence of bacterial population analysed by flow cytometry every 24 h during the three-
- 8 day culture. Cells were stained by Nile Red and processed as described in Supplementary
- 9 Information. (C) Confocal microscopy of *P. putida* cells collected at denoted time intervals.
- 10 Stained bacteria were processed as described in Supplementary Information. White scale bars
- 11 show 2 μm distance. (D) Culture inoculated from overnight pre-cultures in M9 minimal
- 12 medium with 5 g L<sup>-1</sup> cellobiose was carried out in the same conditions as were described for
- 13 (A). (E) Content and monomer composition of medium chain length polyhydroxyalkanoates in
- 14 dry cell weight of *P. putida* EM42 pSEVA2213\_ *bglC* cells collected at the end of the two-day

1 culture. D-xylose, filled squares (■); D-xylonate, filled circles (●); D-xylono- $\lambda$ -lactone, filled  
2 triangles (▲); D-glucose, filled diamonds (◆); D-cellobiose, open circles (○); cell biomass,  
3 open diamonds (◇). Data points and columns in (A), (B), and (C) show mean  $\pm$  SD of three  
4 biological replicates.

5

6
